# Supplementary material for: Improvement of Pseudoalteromonas haloplanktis TAC125 as a Cell Factory: IPTG-Inducible Plasmid Construction and Strain Engineering
Source: PubMed Central journal article supplement (PMC7598627; doi:10.3390/microorganisms8101466), 2020-09-24
Supplement: microorganisms-08-01466-s001.pdf [file microorganisms-08-01466-s001.pdf]

*Supplementary material*

# **Improvement of *Pseudoalteromonas haloplanktis* TAC125 as a Cell Factory: IPTG-Inducible Plasmid Construction and Strain Engineering**

**Andrea Colarusso †, Concetta Lauro †, Marzia Calvanese, Ermenegilda Parrilli and Maria Luisa Tutino \***

Dipartimento di Scienze Chimiche, Complesso Universitario Monte Sant'Angelo, Via Cintia 80126 Napoli, Italia; andrea.colarusso@unina.it, concetta.lauro@unina.it, marzia.calvanese@unina.it, erparril@unina.it

\* Correspondence: tutino@unina.it; Tel.: +39-081-674317

† These authors equally contributed to this work.

## Supplementary Tables

**Table S1.** Strains used in this study.

| Strain                                  | Relevant Traits                                                                                                                                         | Reference or Source          |
|-----------------------------------------|---------------------------------------------------------------------------------------------------------------------------------------------------------|------------------------------|
| <b><i>E. coli</i> strains</b>           |                                                                                                                                                         |                              |
| DH5 $\alpha$                            | <i>supE44, <math>\Delta</math>lacU169 (<math>\phi</math>80 <i>lacZ</i><math>\Delta</math>M15)<br/><i>hsdR17, recA1, endA1, gyrA96, thi-1, relA1</i></i> | Lab stock                    |
| S17-1( <i><math>\lambda</math>pir</i> ) | <i>thi, pro, hsd (r- m+) recA::RP4-2-TCr::Mu Kmr::Tn7, Tpr, Smr, <math>\lambda</math>pir</i>                                                            | [14]                         |
| <b><i>PhTAC125</i> strains</b>          |                                                                                                                                                         |                              |
| <i>PhTAC125 wt</i>                      | Possesses two endogenous plasmids                                                                                                                       | [9,26]                       |
| KrPL                                    | <i>PhTAC125</i> cured strain without pMtBL plasmid                                                                                                      | Lab stock (Unpublished data) |
| KrPL <i>lon</i>                         | Cured strain without pMtBL plasmid<br><i>lon::pVS-lon</i>                                                                                               | This work                    |
| KrPL <i>lacY+</i>                       | Cured strain without pMtBL plasmid<br><i>lon::pVS-lacY</i>                                                                                              | This work                    |

**Table S2.** Oligonucleotides used in this study.

| Primer name      | Sequence (5' - 3')                     | Application |
|------------------|----------------------------------------|-------------|
| p79_fw           | GAAATATAGGCATGCACCATGATAACG            | Cloning     |
| p79_rv           | TGCTCTAGAGTCGACATATGTATTCTGTTGCATAAACG | Cloning     |
| lonA_SpHI fw     | CGGCATGCCCCGTAGATGAGCCTGAGC            | Cloning     |
| lonA_SacI rv     | ACCGAGCTCGTCAATCCCCGAAACC              | Cloning     |
| lonB_SacI fw     | GCCGAGCTCAGATAGCCGATAGTGCC             | Cloning     |
| lonB_EcoRI rv    | GTACCGAATTCTGTAACCTGGCCAATACG          | Cloning     |
| lonB_SpHI fw     | CGGCATGCAGATAGCCGATAGTGCC              | Cloning     |
| lonB_HindIII rv  | GCGAAGCTTTGTAACCTGGCCAATACGG           | Cloning     |
| lonB'_HindIII fw | GCCAAGCTTATAGGTACCAAGGTAAGCTTAGCTAT    | Cloning     |
| lonB'_EcoRI rv   | GGTACGAATTCCTAACCATCTTTAGGCGTTGCG      | Cloning     |
| lon_fw           | CCGATCGAGTCGAAATCCCAGT                 | Screening   |
| lon_rv           | GCACTTGGACCATCTTTAGGCG                 | Screening   |
| lacY_fw          | CCACTTAGCCTATTACGCCGTCAGG              | Screening   |
| lacY_rv          | GTACATATGTATTCTGTTGCATAATCGAC          | Screening   |
| lonY_fw          | GCATTACTTGAGGTGTTAGATCCTGAGC           | Screening   |
| lonY_rv          | CGTTGTCTGGGATCTCTTTAGGTCACG            | Screening   |

|                 |                            |           |
|-----------------|----------------------------|-----------|
| bla_fw          | GCAGCAGCCACTGGTAACAGGATTAG | Screening |
| bla_rv          | CGGAGGACCGAAGGAGCTAACCGC   | Screening |
| pheS_fw         | ATGTCACATCTCGCAGAACTGG     | Screening |
| pheS_rv         | CTGAATTTTCATAATCTATTCCTGCC | Screening |
| R9-gfp_fw       | GGAGAGGGTGAAGGTGATGCT      | qPCR      |
| R9-gfp_rv       | GGTCAGAGTAGTGACAAGTGTGG    | qPCR      |
| lacZ_fw         | ATTCGTTGGAGTGATGGCAGTT     | qPCR      |
| lacZ_rv         | GCGTATTTGGCTTTGCGGTTT      | qPCR      |
| PSHA_RS01090_fw | CTAAAGACCAAATCCTTGACGCA    | qPCR      |
| PSHA_RS01090_rv | GACCAGCTACCATAACCAGCA      | qPCR      |

**Table S3.** Plasmids used in this study.

| Plasmid             | Resistance Marker <sup>1</sup> | Promoter     | Purpose                                             | Reference      |
|---------------------|--------------------------------|--------------|-----------------------------------------------------|----------------|
| pMAV- <i>lacZ</i>   | amp                            | <i>PgalT</i> | Expression of <i>PhTAE79</i> $\beta$ -galactosidase | [3]            |
| pP79- <i>lacZ</i>   | amp                            | <i>PlacZ</i> | Expression of <i>PhTAE79</i> $\beta$ -galactosidase | This work      |
| p79C- <i>lacZ</i>   | cam                            | <i>PlacZ</i> | Expression of <i>PhTAE79</i> $\beta$ -galactosidase | This work      |
| pMAV-R9- <i>gfp</i> | amp                            | <i>PlacZ</i> | Expression of R9-GFP                                | This work [18] |
| pP79-R9- <i>gfp</i> | amp                            | <i>PlacZ</i> | Expression of R9-GFP                                | This work [18] |
| pP79- <i>pgfp</i>   | amp                            | <i>PlacZ</i> | Expression of a codon optimized gene encoding eGFP  | This work      |
| p13C- <i>lacY</i>   | cam                            | P13          | Expression of <i>E. coli</i> lactose permease       | This work [1]  |
| pFC- <i>lacY</i>    | cam                            | <i>PaspC</i> | Expression of <i>E. coli</i> lactose permease       | This work [21] |
| pVS- <i>lon</i>     | amp                            | none         | Mutagenesis of <i>lon</i> in KrPL genome            | This work [22] |
| pVS- <i>lacY</i>    | amp                            | P13          | Mutagenesis of <i>lon</i> in KrPL genome            | This work [22] |

|  |  |  |                                                                  |  |
|--|--|--|------------------------------------------------------------------|--|
|  |  |  | with the insertion<br>of P13- <i>lacY</i><br>expression cassette |  |
|--|--|--|------------------------------------------------------------------|--|

<sup>1</sup>.Amp, ampicillin; cam, chloramphenicol.

## Supplementary Figures

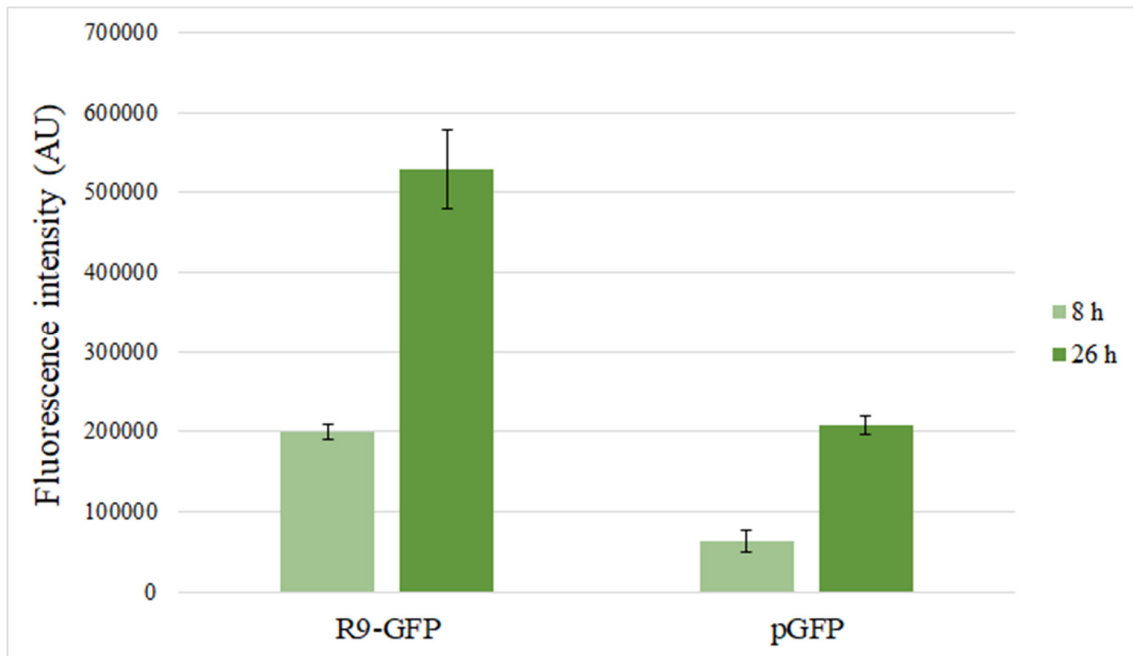

**Figure S1.** Production levels of R9-GFP and pGFP using pP79 expression plasmid. KrPL recombinant cells were grown in GG at 15 °C and induced with 10 mM IPTG in exponential phase. 8h and 26 h after the induction, the autofluorescence of intact non-recombinant cells was subtracted from the fluorescence of plasmid carrying strains. Fluorescence intensities are reported in arbitrary units (AU) as mean  $\pm$  SD,  $n = 3$ .

A

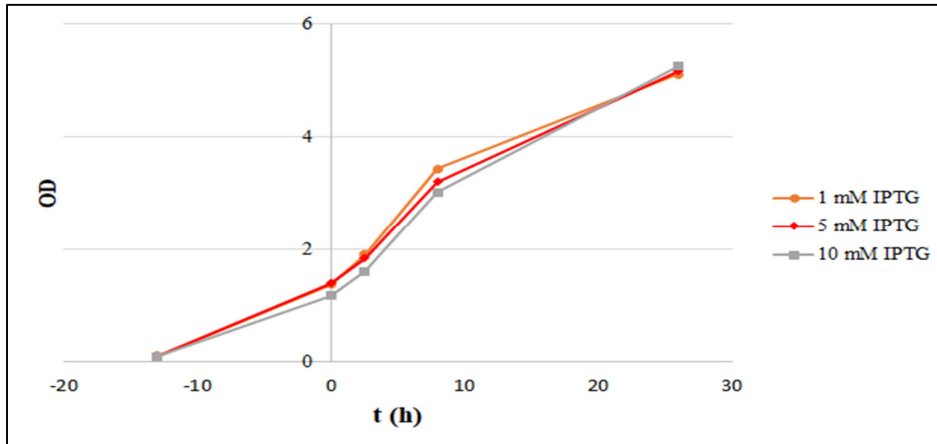

B

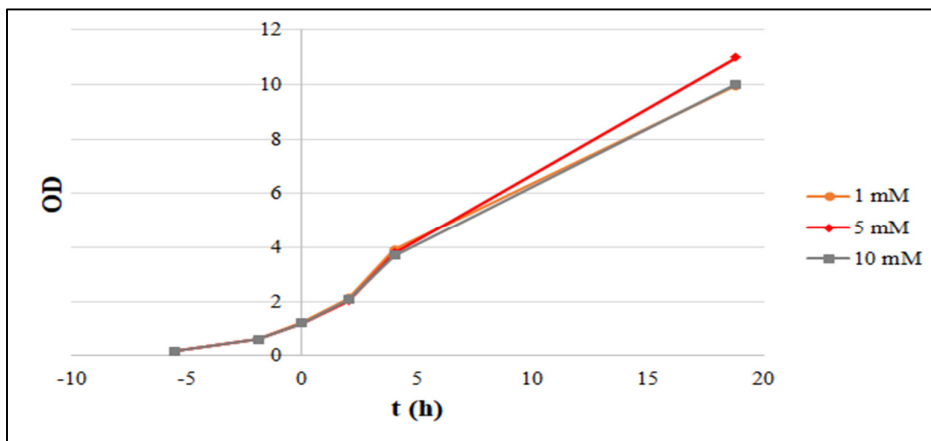

C

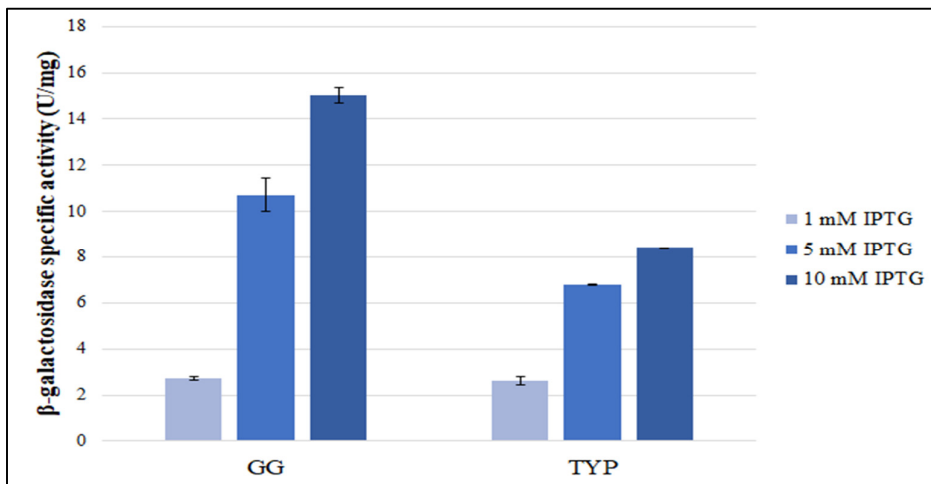

**Figure 2.** Growths of KrPL pP79-*lacZ* and  $\beta$ -galactosidase production in GG and TYP. The recombinant strains were grown in 250 mL Erlenmeyer flasks filled with either 50 mL GG (A) or 50 mL TYP at 15 °C (B). The optical densities were recorded and indicated IPTG quantities were added at time zero (t (h) = 0). (C) At the end of the growth experiments, the  $\beta$ -galactosidase specific activities were assayed and are here reported as mean  $\pm$  SD, n = 3.

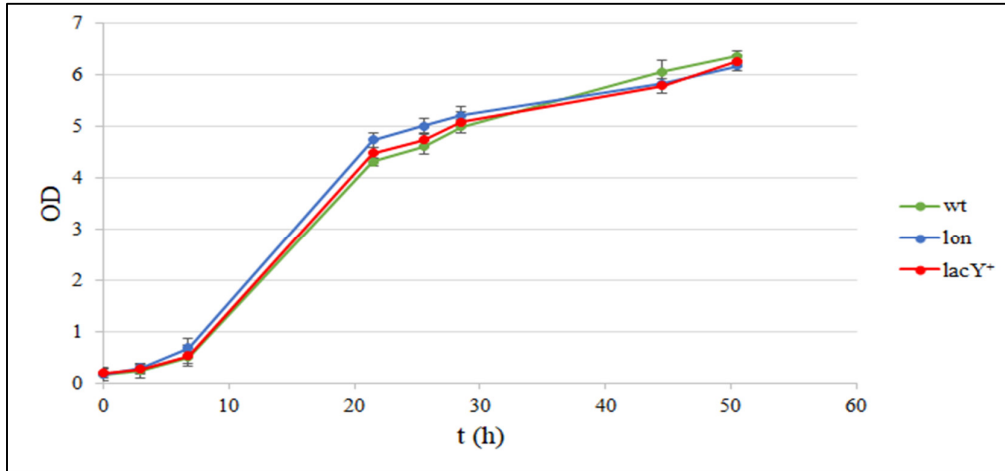

**Figure S3.** Growth curves of KrPL wt, lon and lacY<sup>+</sup> strains. The growths were performed at 15 °C in GG medium. The measures of optical density are expressed as mean  $\pm$  SD,  $n = 2$ .
